# Supplementary material
Source: publisher figshare collection journal article supplement (https://sage.figshare.com/ndownloader/files/22068123)
Supplement: Supplementary file 1 [file 22068123]

### Supplementary material for the article:

Subjective social status is indirectly associated with short-term smoking cessation through nicotine withdrawal symptoms

**Supplemental Table.** Inter-correlations of independent, mediator, and dependent variables

| Variable                                  | (1)   | (2)   | (3)   | (4)   | (5)   | (6)   | (7)  | (8)   | (9)   | (10) |
|-------------------------------------------|-------|-------|-------|-------|-------|-------|------|-------|-------|------|
| Subjective Social Status <sup>a</sup> (1) | -     | -     | -     | -     | -     | -     | -    | -     | -     | -    |
| WSWS Total Score <sup>b</sup> (2)         | -.31* | -     | -     | -     | -     | -     | -    | -     | -     | -    |
| WSWS Anger (3)                            | -.30* | .86*  | -     | -     | -     | -     | -    | -     | -     | -    |
| WSWS Anxiety (4)                          | -.29* | .89*  | .80*  | -     | -     | -     | -    | -     | -     | -    |
| WSWS Concentration (5)                    | -.21* | .75*  | .59*  | .68*  | -     | -     | -    | -     | -     | -    |
| WSWS Craving (6)                          | -.27* | .79*  | .62*  | .67*  | .52*  | -     | -    | -     | -     | -    |
| WSWS Hunger (7)                           | .01   | .33*  | .16   | .13   | .07   | .19*  | -    | -     | -     | -    |
| WSWS Sadness (8)                          | -.30* | .82*  | .73*  | .73*  | .60*  | .59*  | .08  | -     | -     | -    |
| WSWS Sleep (9)                            | -.21* | .64*  | .39*  | .49*  | .41*  | .40*  | .18* | .45*  | -     | -    |
| Smoking Abstinence <sup>c</sup> (10)      | .23*  | -.28* | -.29* | -.24* | -.20* | -.17* | -.10 | -.21* | -.20* | -    |

**Legend:** WSWS = Wisconsin Smoking Withdrawal Scale

\*  $p \leq .05$

<sup>a</sup> Subjective social status was measure one-week before quit day.

<sup>b</sup> Nicotine Withdrawal was measured on quit day.

<sup>c</sup> Smoking status was measured four weeks after quit day. Participants who met abstinence criteria were coded as abstinent (abstinent = 1) and participants who did not meet these criteria were coded as smoking (smoking = 0).

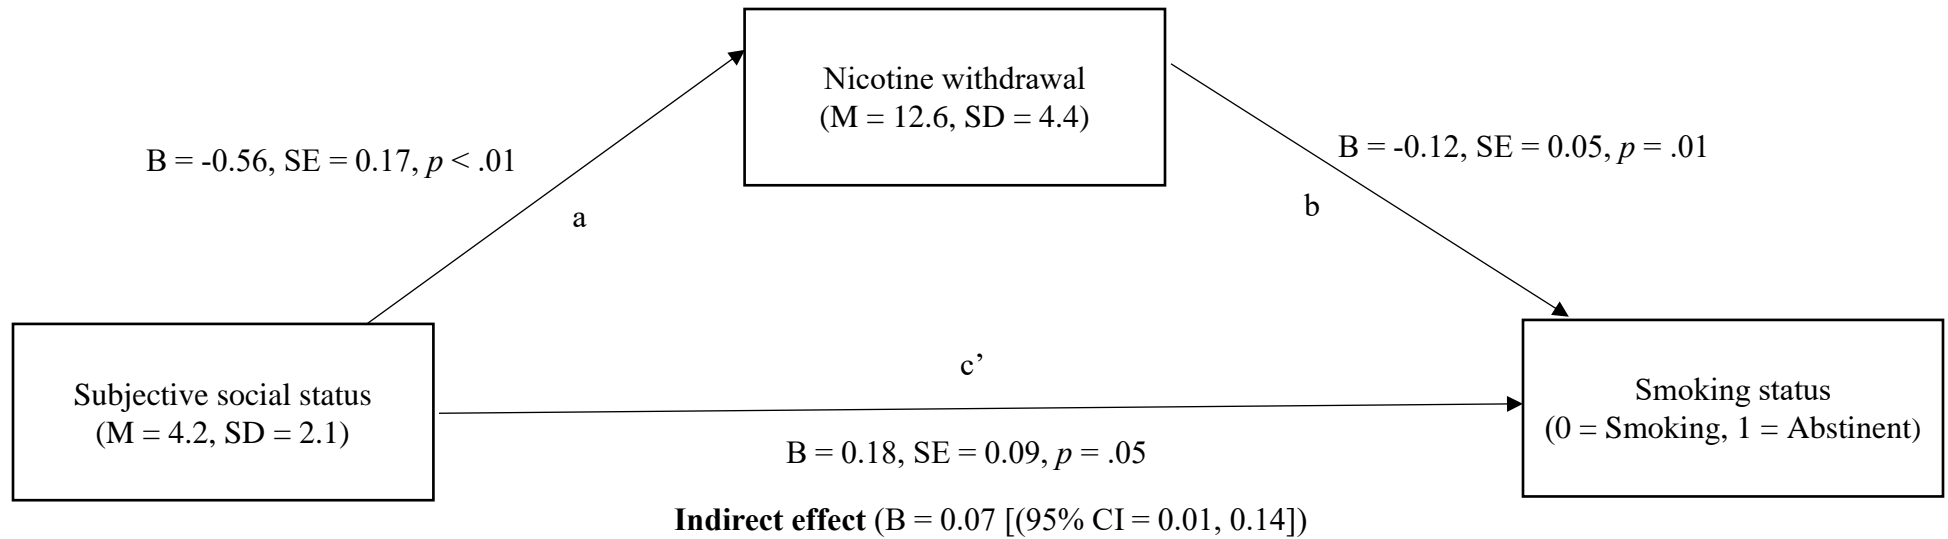

**Supplemental Figure.** A mediation model depicting the direct and indirect effects of subjective social status (SSS) on smoking abstinence four weeks post-quit date. SSS was associated with smoking abstinence four weeks post-quit date ( $B = 0.18$ ,  $SE = 0.09$ ,  $p = .05$ ). SSS was also indirectly associated with smoking abstinence through nicotine withdrawal ( $B = 0.07$  [95% CI = 0.01, 0.14]). Specifically, higher SSS scores were associated with fewer nicotine withdrawal symptoms, and fewer nicotine withdrawal symptoms were associated with higher odds of smoking abstinence.

**Note:** The analysis adjusted for baseline nicotine dependence.
